# Supplementary material
Source: PubMed Central journal article supplement (PMC5058637)
Supplement: am6b02361_si_001.pdf [file am6b02361_si_001.pdf]

## Supporting Information

# Enhancement of the Upconversion Emission by Visible to Near Infrared fluorescent Graphene Quantum Dots for miRNA Detection

Marco Laurenti, Miguel Paez-Perez, Manuel Algarra, Paulino Alonso-Cristobal,  
Enrique Lopez-Cabarcos, Diego Mendez-Gonzalez and Jorge Rubio-Retama \*

<sup>a</sup> Department of Physical Chemistry II, Faculty of Pharmacy, Complutense University of  
Madrid, 28040 Madrid, Spain.

<sup>b</sup> Department of Inorganic Chemistry. Faculty of Science, University of Málaga,  
29071, Málaga (Spain)

\* Corresponding author. Phone/fax: +0034-913941751  
E-mail:bjrubio@ucm.es

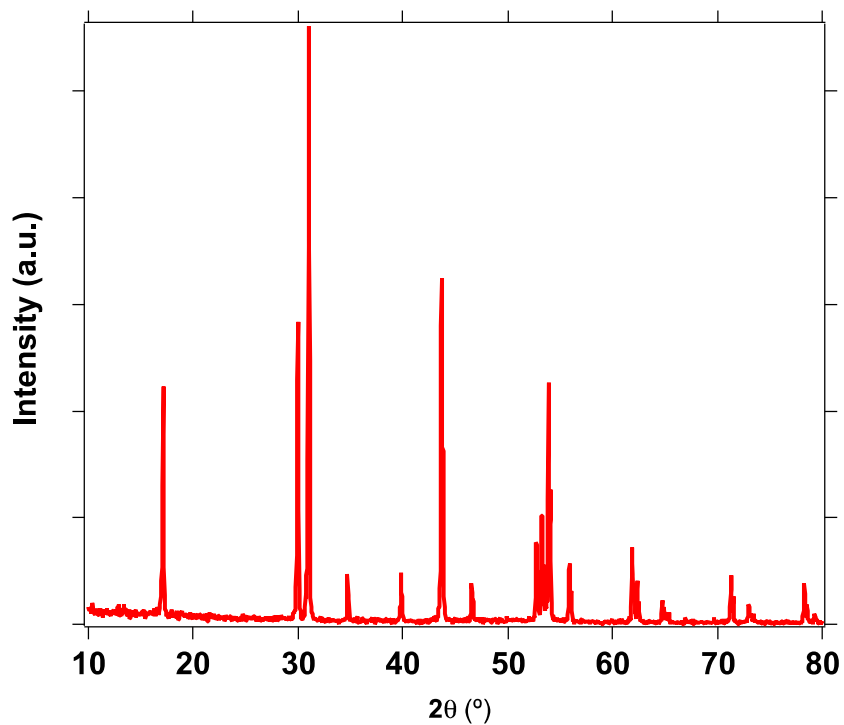

**Figure S1.** XRD pattern of NaYF<sub>4</sub>:Yb,Er, which fitted with the JCPDS standard card 16-0334.

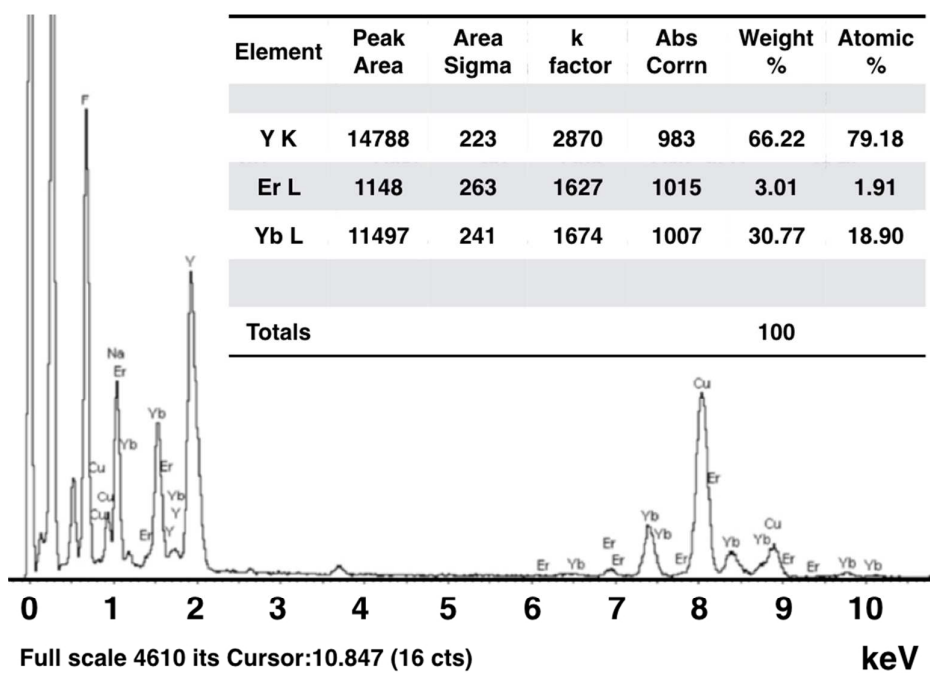

**Figure S2.** EDS spectrum of NaYF<sub>4</sub>:Yb,Er. The table shows the result of the analysis of the atomic composition.
